# Supplementary material for: Surface Functionalization of Magnetite Nanoparticles with Multipotent Antioxidant as Potential Magnetic Nanoantioxidants and Antimicrobial Agents
Source: MDPI journal article supplement (doi:10.3390/molecules27030789), 2022-01-25
Supplement: s1 [file s1]

Supplementary Material

# Surface Functionalization of Magnetite Nanoparticles with Multipotent Antioxidant as Potential Magnetic Nanoantioxidants and Antimicrobial Agents

Syed Tawab Shah <sup>1</sup>, Zaira Zaman Chowdhury <sup>1\*</sup>, Mohd. Rafie Bin Johan <sup>1</sup>, Irfan Anjum Badruddin <sup>2,3</sup>, H. M. T. Khaleed <sup>4</sup>, Sarfaraz Kamangar <sup>2</sup> and Hussein Alrobei <sup>5</sup>

<sup>1</sup> Nanotechnology and Catalysis Research Center, University of Malaya, Kuala Lumpur 50603, Malaysia; tawab\_shah2003@yahoo.com (S.T.S.); mrafiej@um.edu.my (M.R.B.J.)

<sup>2</sup> Department of Mechanical Engineering, College of Engineering, King Khalid University, Abha 61421, Saudi Arabia; irfan@kku.edu.sa (I.A.B.); shiblygsa@gmail.com (S.K.)

<sup>3</sup> Research Center for Advanced Materials Science (RCAMS), King Khalid University, Abha 61413, Saudi Arabia

<sup>4</sup> Department of Mechanical Engineering, Faculty of Engineering, Islamic University of Madinah, Medina 42351, Saudi Arabia; khalid\_tan@yahoo.com

<sup>5</sup> Department of Mechanical Engineering, Faculty of Engineering, Prince Sattam Bin Abdulaziz University, Al-Kharj 16278, Saudi Arabia; h.alrobei@psau.edu.sa

\* Correspondence: dr.zaira.chowdhury@um.edu.my or zaira.chowdhury76@gmail.com; Tel: +60-37-967-2929 or +60-10-267-5621

**Table S1.** Part of the Predicted Biological Activity Spectra of the MPAO based on PASS Prediction Software.

| Pa    | Pi    | Biological Activity                              |
|-------|-------|--------------------------------------------------|
| 0.884 | 0.004 | Skin irritation, inactive                        |
| 0.861 | 0.008 | Antiseborrheic                                   |
| 0.811 | 0.016 | Mucomembranous protector                         |
| 0.778 | 0.006 | Lipoprotein lipase inhibitor                     |
| 0.738 | 0.008 | Radioprotector                                   |
| 0.727 | 0.004 | Acaricide                                        |
| 0.726 | 0.005 | Eye irritation, inactive                         |
| 0.678 | 0.016 | Hypolipemic                                      |
| 0.671 | 0.017 | Fucoesterol-epoxide lyase inhibitor              |
| 0.651 | 0.013 | Cholesterol antagonist                           |
| 0.620 | 0.019 | Lipid metabolism regulator                       |
| 0.605 | 0.019 | Linoleate diol synthase inhibitor                |
| 0.624 | 0.042 | Alkenylglycerophosphocholine hydrolase inhibitor |
| 0.602 | 0.024 | General pump inhibitor                           |
| 0.652 | 0.079 | Aspulvinone dimethylallyltransferase inhibitor   |
| 0.583 | 0.014 | Hepatoprotectant                                 |
| 0.595 | 0.033 | Antiinflammatory                                 |
| 0.573 | 0.013 | Antiulcerative                                   |
| 0.571 | 0.014 | Anesthetic general                               |
| 0.568 | 0.036 | Feruloyl esterase inhibitor                      |

|              |       |                                                                                                 |
|--------------|-------|-------------------------------------------------------------------------------------------------|
| <b>0.550</b> | 0.020 | TNF expression inhibitor                                                                        |
| <b>0.538</b> | 0.014 | Acetylgalactosaminyl-O-glycosyl-glycoprotein beta-1,3-N-acetylglucosaminyltransferase inhibitor |
| <b>0.538</b> | 0.041 | Phosphatidylcholine-retinol O-acyltransferase inhibitor                                         |
| <b>0.509</b> | 0.015 | Antiparasitic                                                                                   |
| <b>0.537</b> | 0.045 | Venombin AB inhibitor                                                                           |
| <b>0.542</b> | 0.051 | Cytoprotectant                                                                                  |
| <b>0.545</b> | 0.058 | Acute neurologic disorders treatment                                                            |
| <b>0.507</b> | 0.025 | 1-Alkylglycerophosphocholine O-acetyltransferase inhibitor                                      |
| <b>0.503</b> | 0.024 | Reductant                                                                                       |
| <b>0.586</b> | 0.113 | Ubiquinol-cytochrome-c reductase inhibitor                                                      |
| <b>0.499</b> | 0.035 | Kinase inhibitor                                                                                |
| <b>0.542</b> | 0.084 | Antiischemic, cerebral                                                                          |
| <b>0.504</b> | 0.050 | Lysine 2,3-aminomutase inhibitor                                                                |
| <b>0.477</b> | 0.025 | Antihypercholesterolemic                                                                        |
| <b>0.456</b> | 0.013 | Free radical scavenger                                                                          |
| <b>0.449</b> | 0.006 | ICAM1 expression inhibitor                                                                      |
| <b>0.489</b> | 0.047 | Membrane integrity antagonist                                                                   |
| <b>0.474</b> | 0.033 | Antiallergic                                                                                    |
| <b>0.481</b> | 0.047 | Antianginal                                                                                     |
| <b>0.462</b> | 0.038 | Antisecretoric                                                                                  |
| <b>0.458</b> | 0.042 | Alkenylglycerophosphoethanolamine hydrolase inhibitor                                           |
| <b>0.469</b> | 0.057 | Leukopoiesis stimulant                                                                          |
| <b>0.414</b> | 0.005 | Retinoprotector                                                                                 |
| <b>0.436</b> | 0.033 | Antimyopathies                                                                                  |
| <b>0.417</b> | 0.016 | Ethanolaminephosphotransferase inhibitor                                                        |
| <b>0.402</b> | 0.009 | Antidote                                                                                        |
| <b>0.430</b> | 0.043 | All-trans-retinyl-palmitate hydrolase inhibitor                                                 |
| <b>0.470</b> | 0.083 | Protein-disulfide reductase (glutathione) inhibitor                                             |
| <b>0.447</b> | 0.063 | Thromboxane B2 antagonist                                                                       |
| <b>0.412</b> | 0.035 | Atherosclerosis treatment                                                                       |
| <b>0.402</b> | 0.027 | Vanilloid 1 agonist                                                                             |
| <b>0.372</b> | 0.014 | Anticataract                                                                                    |
| <b>0.378</b> | 0.021 | Ubiquitin thiolesterase inhibitor                                                               |
| <b>0.366</b> | 0.013 | ErbB-1 antagonist                                                                               |
| <b>0.394</b> | 0.043 | 1-Acylglycerol-3-phosphate O-acyltransferase inhibitor                                          |
| <b>0.354</b> | 0.002 | Glycine receptor agonist                                                                        |
| <b>0.364</b> | 0.013 | Expectorant                                                                                     |
| <b>0.375</b> | 0.028 | Ophthalmic drug                                                                                 |
| <b>0.444</b> | 0.100 | Proteasome ATPase inhibitor                                                                     |
| <b>0.352</b> | 0.010 | Restenosis treatment                                                                            |
| <b>0.353</b> | 0.014 | Anti-Helicobacter pylori                                                                        |
| <b>0.428</b> | 0.091 | NADPH peroxidase inhibitor                                                                      |

|              |       |                                                                 |
|--------------|-------|-----------------------------------------------------------------|
| <b>0.347</b> | 0.012 | Antiprotozoal (Trichomonas)                                     |
| <b>0.428</b> | 0.095 | Mannotetraose 2-alpha-N-acetylglucosaminyltransferase inhibitor |
| <b>0.401</b> | 0.070 | Alcohol O-acetyltransferase inhibitor                           |
| <b>0.406</b> | 0.076 | Trimethylamine-oxide aldolase inhibitor                         |
| <b>0.364</b> | 0.046 | Phosphatidylinositol diacylglycerol-lyase inhibitor             |
| <b>0.320</b> | 0.006 | Lipoxygenase inhibitor                                          |
| <b>0.315</b> | 0.003 | Antidote, heavy metal                                           |
| <b>0.401</b> | 0.090 | Histamine release inhibitor                                     |
| <b>0.401</b> | 0.091 | Alkylacetylglycerophosphatase inhibitor                         |
| <b>0.344</b> | 0.041 | Carboxypeptidase D inhibitor                                    |
| <b>0.351</b> | 0.049 | Lipid peroxidase inhibitor                                      |
| <b>0.297</b> | 0.007 | Phospholipase A2 inhibitor                                      |
| <b>0.374</b> | 0.086 | Ecdysone 20-monooxygenase inhibitor                             |
| <b>0.312</b> | 0.023 | Retinol dehydrogenase inhibitor                                 |
| <b>0.331</b> | 0.044 | Antinephritic                                                   |
| <b>0.303</b> | 0.016 | Poly(3-hydroxybutyrate) depolymerase inhibitor                  |
| <b>0.330</b> | 0.043 | Antiinflammatory, ophthalmic                                    |
| <b>0.395</b> | 0.114 | Glyceryl-ether monooxygenase inhibitor                          |
| <b>0.365</b> | 0.086 | Pancreatic elastase inhibitor                                   |
| <b>0.329</b> | 0.050 | Acidifying agent non gastric                                    |
| <b>0.282</b> | 0.004 | VCAM1 expression inhibitor                                      |
| <b>0.310</b> | 0.034 | Antipruritic, non-allergic                                      |
| <b>0.291</b> | 0.015 | Gastric antisecretory                                           |
| <b>0.288</b> | 0.015 | Protein-S-isoprenylcysteine O-methyltransferase inhibitor       |
| <b>0.303</b> | 0.030 | Alpha-amylase inhibitor                                         |
| <b>0.286</b> | 0.015 | Mucolytic                                                       |
| <b>0.384</b> | 0.116 | Chlordecone reductase inhibitor                                 |
| <b>0.317</b> | 0.052 | Anticarcinogenic                                                |
| <b>0.366</b> | 0.101 | Apyrase inhibitor                                               |
| <b>0.278</b> | 0.016 | Endoglycosylceramidase inhibitor                                |
| <b>0.285</b> | 0.026 | Antioxidant                                                     |
| <b>0.327</b> | 0.069 | Antidiabetic                                                    |
| <b>0.409</b> | 0.152 | Fusarinine-C ornithinesterase inhibitor                         |
| <b>0.273</b> | 0.018 | Cystinyl aminopeptidase inhibitor                               |
| <b>0.320</b> | 0.067 | Nitrite reductase (NO-forming) inhibitor                        |
| <b>0.327</b> | 0.074 | Mediator release inhibitor                                      |
| <b>0.410</b> | 0.158 | Chymosin inhibitor                                              |
| <b>0.410</b> | 0.158 | Acrocylindropepsin inhibitor                                    |
| <b>0.410</b> | 0.158 | Saccharopepsin inhibitor                                        |
| <b>0.383</b> | 0.132 | Sugar-phosphatase inhibitor                                     |
| <b>0.289</b> | 0.038 | Chemoprotective                                                 |
| <b>0.273</b> | 0.025 | Lipoprotein disorders treatment                                 |

|              |       |                                                             |
|--------------|-------|-------------------------------------------------------------|
| <b>0.365</b> | 0.119 | 1,4-Lactonase inhibitor                                     |
| <b>0.265</b> | 0.020 | Leukotriene synthesis inhibitor                             |
| <b>0.284</b> | 0.039 | Antiseptic                                                  |
| <b>0.297</b> | 0.052 | Levansucrase inhibitor                                      |
| <b>0.253</b> | 0.013 | Stromelysin 2 inhibitor                                     |
| <b>0.287</b> | 0.047 | Non-steroidal antiinflammatory agent                        |
| <b>0.329</b> | 0.090 | Phenol O-methyltransferase inhibitor                        |
| <b>0.318</b> | 0.079 | Dermatologic                                                |
| <b>0.322</b> | 0.083 | Retinoic acid metabolism inhibitor                          |
| <b>0.307</b> | 0.069 | FMO3 substrate                                              |
| <b>0.384</b> | 0.150 | TP53 expression enhancer                                    |
| <b>0.267</b> | 0.034 | Protein-tyrosine sulfotransferase inhibitor                 |
| <b>0.335</b> | 0.102 | Peptide agonist                                             |
| <b>0.274</b> | 0.042 | Choleretic                                                  |
| <b>0.289</b> | 0.058 | Maillard reaction inhibitor                                 |
| <b>0.241</b> | 0.011 | Antiemphysemic                                              |
| <b>0.333</b> | 0.103 | Caspase 8 stimulant                                         |
| <b>0.324</b> | 0.094 | N-acetylneuraminate 7-O(or 9-O)-acetyltransferase inhibitor |
| <b>0.233</b> | 0.003 | Prostaglandin EP4 antagonist                                |
| <b>0.279</b> | 0.050 | Pediculicide                                                |
| <b>0.241</b> | 0.015 | Phospholipase inhibitor                                     |
| <b>0.301</b> | 0.076 | Antipsoriatic                                               |
| <b>0.284</b> | 0.059 | Methane monooxygenase inhibitor                             |
| <b>0.346</b> | 0.121 | Acylcarnitine hydrolase inhibitor                           |
| <b>0.307</b> | 0.085 | Antiasthmatic                                               |
| <b>0.261</b> | 0.041 | Acyl-CoA oxidase inhibitor                                  |
| <b>0.282</b> | 0.062 | Photosensitizer                                             |
| <b>0.278</b> | 0.061 | CYP2E1 substrate                                            |
| <b>0.235</b> | 0.019 | Arachidonic acid antagonist                                 |
| <b>0.253</b> | 0.038 | Histone acetyltransferase inhibitor                         |
| <b>0.252</b> | 0.037 | Antinaupathic                                               |
| <b>0.262</b> | 0.049 | Anesthetic                                                  |
| <b>0.346</b> | 0.133 | Preneoplastic conditions treatment                          |
| <b>0.240</b> | 0.028 | Diacylglycerol cholinephosphotransferase inhibitor          |
| <b>0.318</b> | 0.108 | Superoxide dismutase inhibitor                              |
| <b>0.291</b> | 0.082 | Neuropeptide Y2 antagonist                                  |
| <b>0.236</b> | 0.026 | Retinyl-palmitate esterase inhibitor                        |
| <b>0.267</b> | 0.058 | Ferredoxin hydrogenase inhibitor                            |
| <b>0.237</b> | 0.028 | Microtubule formation inhibitor                             |
| <b>0.230</b> | 0.022 | Methylglutamate dehydrogenase inhibitor                     |
| <b>0.215</b> | 0.007 | 5-Lipoxygenase inhibitor                                    |
| <b>0.284</b> | 0.078 | 4-Coumarate-CoA ligase inhibitor                            |

|              |       |                                                            |
|--------------|-------|------------------------------------------------------------|
| <b>0.268</b> | 0.061 | Hepatic disorders treatment                                |
| <b>0.232</b> | 0.026 | Calcium channel blocker                                    |
| <b>0.270</b> | 0.064 | CYP2E substrate                                            |
| <b>0.424</b> | 0.219 | Phobic disorders treatment                                 |
| <b>0.308</b> | 0.104 | Peptidoglycan glycosyltransferase inhibitor                |
| <b>0.339</b> | 0.135 | Aspartyltransferase inhibitor                              |
| <b>0.272</b> | 0.069 | Arylesterase inhibitor                                     |
| <b>0.205</b> | 0.003 | Prostaglandin E2 agonist                                   |
| <b>0.337</b> | 0.141 | Oxygen scavenger                                           |
| <b>0.346</b> | 0.150 | NADPH-cytochrome-c2 reductase inhibitor                    |
| <b>0.264</b> | 0.068 | Clavamate synthase inhibitor                               |
| <b>0.227</b> | 0.034 | Aldehyde dehydrogenase inhibitor                           |
| <b>0.215</b> | 0.023 | O-acetylhomoserine aminocarboxypropyltransferase inhibitor |
| <b>0.361</b> | 0.170 | Glycosylphosphatidylinositol phospholipase D inhibitor     |
| <b>0.261</b> | 0.071 | Undecaprenyl-phosphate mannosyltransferase inhibitor       |
| <b>0.299</b> | 0.110 | Antihelmintic (Nematodes)                                  |
| <b>0.265</b> | 0.077 | Dextranase inhibitor                                       |
| <b>0.259</b> | 0.072 | Phosphatidylcholine-sterol O-acyltransferase inhibitor     |
| <b>0.333</b> | 0.146 | Glucan endo-1,3-beta-D-glucosidase inhibitor               |
| <b>0.309</b> | 0.122 | Apoptosis agonist                                          |
| <b>0.247</b> | 0.061 | Shikimate O-hydroxycinnamoyltransferase inhibitor          |
| <b>0.206</b> | 0.022 | Leishmanolysin inhibitor                                   |
| <b>0.210</b> | 0.026 | Skin whitener                                              |
| <b>0.310</b> | 0.126 | GST A substrate                                            |
| <b>0.217</b> | 0.035 | Antiglaucomic                                              |
| <b>0.232</b> | 0.050 | Vanilloid agonist                                          |
| <b>0.230</b> | 0.048 | Inorganic diphosphatase inhibitor                          |
| <b>0.261</b> | 0.080 | Antitoxic                                                  |
| <b>0.274</b> | 0.094 | Methylenetetrahydrofolate reductase (NADPH) inhibitor      |
| <b>0.291</b> | 0.112 | CYP3A4 inducer                                             |
| <b>0.275</b> | 0.096 | CYP2C19 substrate                                          |
| <b>0.235</b> | 0.056 | Glycine dehydrogenase (decarboxylating) inhibitor          |
| <b>0.311</b> | 0.132 | 5 Hydroxytryptamine release inhibitor                      |
| <b>0.241</b> | 0.063 | Cutinase inhibitor                                         |
| <b>0.285</b> | 0.108 | Mucinamylserine mucinaminidase inhibitor                   |
| <b>0.222</b> | 0.044 | Aldehyde dehydrogenase (NADP+) inhibitor                   |
| <b>0.296</b> | 0.120 | Antipruritic                                               |
| <b>0.383</b> | 0.207 | Phosphatase inhibitor                                      |
| <b>0.240</b> | 0.065 | Sclerosant                                                 |
| <b>0.307</b> | 0.133 | Hydrogen dehydrogenase inhibitor                           |
| <b>0.221</b> | 0.048 | Penicillin amidase inhibitor                               |
| <b>0.279</b> | 0.106 | HMOX1 expression enhancer                                  |

|              |       |                                                               |
|--------------|-------|---------------------------------------------------------------|
| <b>0.289</b> | 0.117 | CDP-diacylglycerol-serine O-phosphatidyltransferase inhibitor |
| <b>0.276</b> | 0.105 | Phosphoinositide 5-phosphatase inhibitor                      |
| <b>0.268</b> | 0.097 | Antifungal                                                    |
| <b>0.276</b> | 0.106 | Plastoquinol-plastocyanin reductase inhibitor                 |
| <b>0.205</b> | 0.035 | Pectate lyase inhibitor                                       |
| <b>0.259</b> | 0.091 | Pyruvate decarboxylase inhibitor                              |
| <b>0.190</b> | 0.022 | Adenylate cyclase stimulant                                   |
| <b>0.240</b> | 0.073 | Lactose synthase inhibitor                                    |
| <b>0.192</b> | 0.025 | Lactoylglutathione lyase inhibitor                            |
| <b>0.380</b> | 0.213 | Antieczematic                                                 |
| <b>0.235</b> | 0.069 | Di-trans,poly-cis-decaprenylcistransferase inhibitor          |
| <b>0.277</b> | 0.113 | CYP3A inducer                                                 |
| <b>0.261</b> | 0.096 | Steroid N-acetylglucosaminyltransferase inhibitor             |
| <b>0.337</b> | 0.172 | Electron-transferring-flavoprotein dehydrogenase inhibitor    |
| <b>0.335</b> | 0.172 | Membrane integrity agonist                                    |
| <b>0.270</b> | 0.108 | Cardioprotectant                                              |
| <b>0.271</b> | 0.110 | 3-Cyanoalanine hydratase inhibitor                            |
| <b>0.199</b> | 0.038 | Insecticide                                                   |
| <b>0.284</b> | 0.123 | CYP2A4 substrate                                              |
| <b>0.290</b> | 0.130 | N-hydroxyarylamine O-acetyltransferase inhibitor              |
| <b>0.340</b> | 0.181 | CYP2C8 inhibitor                                              |
| <b>0.258</b> | 0.099 | Mannose isomerase inhibitor                                   |
| <b>0.237</b> | 0.078 | Prolyl aminopeptidase inhibitor                               |
| <b>0.164</b> | 0.006 | Leukotriene antagonist                                        |
| <b>0.221</b> | 0.063 | Cyclopropane-fatty-acyl-phospholipid synthase inhibitor       |
| <b>0.284</b> | 0.127 | Transcription factor NF kappa B stimulant                     |
| <b>0.284</b> | 0.127 | Transcription factor stimulant                                |
| <b>0.194</b> | 0.038 | Melanin inhibitor                                             |
| <b>0.188</b> | 0.033 | Carboxylesterase inhibitor                                    |
| <b>0.229</b> | 0.074 | Thiol protease inhibitor                                      |
| <b>0.299</b> | 0.144 | Antipruritic, allergic                                        |
| <b>0.317</b> | 0.162 | APOA1 expression enhancer                                     |
| <b>0.343</b> | 0.189 | 5-O-(4-coumaroyl)-D-quinic 3'-monooxygenase inhibitor         |
| <b>0.157</b> | 0.005 | Adenine nucleotide translocase inhibitor                      |
| <b>0.180</b> | 0.029 | Agmatinase inhibitor                                          |
| <b>0.189</b> | 0.039 | Antihyperlipoproteinemic                                      |
| <b>0.191</b> | 0.041 | Pyroglutamyl-peptidase I inhibitor                            |
| <b>0.228</b> | 0.080 | Dactylisin inhibitor                                          |
| <b>0.245</b> | 0.097 | Pullulanase inhibitor                                         |
| <b>0.279</b> | 0.132 | Sphinganine kinase inhibitor                                  |
| <b>0.212</b> | 0.065 | Lipoprotein lipase stimulant                                  |
| <b>0.180</b> | 0.033 | Alcohol dehydrogenase substrate                               |

|              |       |                                                                             |
|--------------|-------|-----------------------------------------------------------------------------|
| <b>0.278</b> | 0.132 | Leukotriene-C4 synthase inhibitor                                           |
| <b>0.352</b> | 0.206 | Kidney function stimulant                                                   |
| <b>0.176</b> | 0.031 | Thiol S-methyltransferase inhibitor                                         |
| <b>0.180</b> | 0.035 | Aspartyl aminopeptidase inhibitor                                           |
| <b>0.213</b> | 0.070 | Antiuremic                                                                  |
| <b>0.243</b> | 0.100 | Monodehydroascorbate reductase (NADH) inhibitor                             |
| <b>0.145</b> | 0.003 | Free fatty acid receptor 1 agonist                                          |
| <b>0.285</b> | 0.144 | Benzoate-CoA ligase inhibitor                                               |
| <b>0.272</b> | 0.130 | Manganese peroxidase inhibitor                                              |
| <b>0.289</b> | 0.148 | Fragilysin inhibitor                                                        |
| <b>0.204</b> | 0.064 | Coenzyme-B sulfoethylthiotransferase inhibitor                              |
| <b>0.268</b> | 0.127 | Bilirubin oxidase inhibitor                                                 |
| <b>0.221</b> | 0.082 | UGT1A6 substrate                                                            |
| <b>0.329</b> | 0.191 | Ribulose-phosphate 3-epimerase inhibitor                                    |
| <b>0.215</b> | 0.078 | CDP-diacylglycerol-glycerol-3-phosphate 3-phosphatidyltransferase inhibitor |
| <b>0.196</b> | 0.060 | Sterol 3-beta-glucosyltransferase inhibitor                                 |
| <b>0.232</b> | 0.097 | Gamma-glutamyltransferase inhibitor                                         |
| <b>0.185</b> | 0.052 | Cytosol alanyl aminopeptidase inhibitor                                     |
| <b>0.278</b> | 0.145 | S-formylglutathione hydrolase inhibitor                                     |
| <b>0.242</b> | 0.110 | Immunomodulator                                                             |
| <b>0.205</b> | 0.073 | Endopeptidase inhibitor                                                     |
| <b>0.162</b> | 0.032 | Caspase 3 inhibitor                                                         |
| <b>0.189</b> | 0.059 | Deoxyribonuclease I inhibitor                                               |
| <b>0.219</b> | 0.090 | [acyl-carrier-protein] S-acetyltransferase inhibitor                        |
| <b>0.163</b> | 0.034 | Cyclooxygenase 1 inhibitor                                                  |
| <b>0.197</b> | 0.068 | Lymphocytopoiesis inhibitor                                                 |
| <b>0.241</b> | 0.112 | RNA synthesis inhibitor                                                     |
| <b>0.175</b> | 0.047 | Phosphoinositide phospholipase C inhibitor                                  |
| <b>0.132</b> | 0.004 | Prostaglandin EP1 antagonist                                                |
| <b>0.153</b> | 0.025 | Homocysteine S-methyltransferase inhibitor                                  |
| <b>0.230</b> | 0.103 | Aspergillus nuclease S1 inhibitor                                           |
| <b>0.192</b> | 0.066 | Anthrax lethal factor inhibitor                                             |
| <b>0.224</b> | 0.098 | Antibacterial                                                               |
| <b>0.197</b> | 0.071 | Proteasome endopeptidase complex inhibitor                                  |
| <b>0.341</b> | 0.218 | Nicotinic alpha4beta4 receptor agonist                                      |
| <b>0.233</b> | 0.111 | UGT1A9 substrate                                                            |
| <b>0.127</b> | 0.004 | Prostaglandin EP2 antagonist                                                |
| <b>0.186</b> | 0.064 | Isopenicillin-N synthase inhibitor                                          |
| <b>0.227</b> | 0.106 | 2-Hydroxymuconate-semialdehyde hydrolase inhibitor                          |
| <b>0.235</b> | 0.115 | N-formylmethionyl-peptidase inhibitor                                       |
| <b>0.160</b> | 0.040 | Sarcosine oxidase inhibitor                                                 |
| <b>0.204</b> | 0.085 | Fumarate reductase (NADH) inhibitor                                         |

|              |       |                                                                      |
|--------------|-------|----------------------------------------------------------------------|
| <b>0.205</b> | 0.086 | Pappalysin-1 inhibitor                                               |
| <b>0.177</b> | 0.059 | Keratolytic                                                          |
| <b>0.247</b> | 0.129 | Dolichyl-diphosphooligosaccharide-protein glycotransferase inhibitor |
| <b>0.270</b> | 0.154 | Arginine 2-monooxygenase inhibitor                                   |
| <b>0.370</b> | 0.255 | CYP2H substrate                                                      |
| <b>0.244</b> | 0.129 | Aldehyde oxidase inhibitor                                           |
| <b>0.144</b> | 0.029 | Aldehyde dehydrogenase substrate                                     |
| <b>0.217</b> | 0.103 | NOS2 expression inhibitor                                            |
| <b>0.186</b> | 0.074 | Malate dehydrogenase inhibitor                                       |
| <b>0.267</b> | 0.155 | Malate dehydrogenase (acceptor) inhibitor                            |
| <b>0.267</b> | 0.156 | GABA aminotransferase inhibitor                                      |
| <b>0.148</b> | 0.038 | Aspartate kinase inhibitor                                           |
| <b>0.158</b> | 0.047 | Cyclooxygenase inhibitor                                             |
| <b>0.162</b> | 0.052 | 3-Ketovalidoxylamine C-N-lyase inhibitor                             |
| <b>0.194</b> | 0.085 | Levanase inhibitor                                                   |
| <b>0.123</b> | 0.014 | Glutathione S-transferase inhibitor                                  |
| <b>0.235</b> | 0.128 | 4-Hydroxymandelate oxidase inhibitor                                 |
| <b>0.177</b> | 0.070 | Glyoxylate reductase (NADP+) inhibitor                               |
| <b>0.231</b> | 0.126 | Urethanase inhibitor                                                 |
| <b>0.205</b> | 0.099 | Dopamine release stimulant                                           |
| <b>0.212</b> | 0.109 | Long-chain-aldehyde dehydrogenase inhibitor                          |
| <b>0.176</b> | 0.073 | 2,3-Dihydroxyindole 2,3-dioxygenase inhibitor                        |
| <b>0.224</b> | 0.122 | Transcription factor NF kappa A inhibitor                            |
| <b>0.177</b> | 0.075 | Aureolysin inhibitor                                                 |
| <b>0.181</b> | 0.080 | CYP4F2 substrate                                                     |
| <b>0.180</b> | 0.080 | 3-Demethylubiquinone-9 3-O-methyltransferase inhibitor               |
| <b>0.197</b> | 0.097 | Glutaminase inhibitor                                                |
| <b>0.334</b> | 0.235 | Polyporopepsin inhibitor                                             |
| <b>0.167</b> | 0.067 | Gametolysin inhibitor                                                |
| <b>0.194</b> | 0.095 | Antiviral (Hepatitis B)                                              |
| <b>0.281</b> | 0.181 | 2-Dehydropantoate 2-reductase inhibitor                              |
| <b>0.107</b> | 0.008 | Prostaglandin agonist                                                |
| <b>0.182</b> | 0.084 | Polygalacturonase inhibitor                                          |
| <b>0.306</b> | 0.209 | Trans-acenaphthene-1,2-diol dehydrogenase inhibitor                  |
| <b>0.193</b> | 0.096 | Oryzin inhibitor                                                     |
| <b>0.299</b> | 0.204 | Fibrinolytic                                                         |
| <b>0.196</b> | 0.101 | Ceramide glucosyltransferase inhibitor                               |
| <b>0.195</b> | 0.101 | Thiopurine S-methyltransferase inhibitor                             |
| <b>0.136</b> | 0.042 | Pyrimidine-deoxynucleoside 2'-dioxygenase inhibitor                  |
| <b>0.251</b> | 0.157 | CYP2C9 substrate                                                     |
| <b>0.224</b> | 0.130 | Phosphopantothenoylcysteine decarboxylase inhibitor                  |
| <b>0.215</b> | 0.122 | Phospholipase C inhibitor                                            |

|              |       |                                                             |
|--------------|-------|-------------------------------------------------------------|
| <b>0.244</b> | 0.151 | Antithrombotic                                              |
| <b>0.142</b> | 0.051 | Thromboxane synthase stimulant                              |
| <b>0.128</b> | 0.037 | UDP-N-acetylglucosamine 1-carboxyvinyltransferase inhibitor |
| <b>0.213</b> | 0.123 | Flavin-containing monooxygenase substrate                   |
| <b>0.157</b> | 0.068 | Peptidylamidoglycolate lyase inhibitor                      |
| <b>0.181</b> | 0.093 | Phospholipase A1 inhibitor                                  |
| <b>0.173</b> | 0.087 | Metallocoarboxypeptidase D inhibitor                        |
| <b>0.211</b> | 0.125 | Angiogenesis stimulant                                      |
| <b>0.136</b> | 0.049 | Calcium channel (voltage-sensitive) blocker                 |
| <b>0.187</b> | 0.101 | Peroxidase inhibitor                                        |
| <b>0.172</b> | 0.086 | Polyneuridine-aldehyde esterase inhibitor                   |
| <b>0.199</b> | 0.114 | Antipyretic                                                 |
| <b>0.312</b> | 0.228 | Antiviral (Rhinovirus)                                      |
| <b>0.254</b> | 0.169 | CYP3A5 substrate                                            |
| <b>0.258</b> | 0.174 | Biotinidase inhibitor                                       |
| <b>0.188</b> | 0.106 | UDP-glucuronosyltransferase substrate                       |
| <b>0.120</b> | 0.039 | tRNA (guanine-N1-)-methyltransferase inhibitor              |
| <b>0.204</b> | 0.123 | Catenin beta inhibitor                                      |
| <b>0.239</b> | 0.158 | Fatty-acyl-CoA synthase inhibitor                           |
| <b>0.224</b> | 0.143 | Arylsulfate sulfotransferase inhibitor                      |
| <b>0.158</b> | 0.078 | Alkylator                                                   |
| <b>0.252</b> | 0.173 | Gonadotropin antagonist                                     |
| <b>0.152</b> | 0.073 | Thioredoxin reductase inhibitor                             |
| <b>0.159</b> | 0.080 | 4-Hydroxybenzoate nonaprenyltransferase inhibitor           |
| <b>0.133</b> | 0.054 | Kexin inhibitor                                             |
| <b>0.188</b> | 0.110 | Diabetic nephropathy treatment                              |
| <b>0.133</b> | 0.055 | Furin inhibitor                                             |
| <b>0.319</b> | 0.241 | Testosterone 17beta-dehydrogenase (NADP+) inhibitor         |
| <b>0.227</b> | 0.149 | Antiinflammatory, intestinal                                |
| <b>0.158</b> | 0.081 | Licheninase inhibitor                                       |
| <b>0.274</b> | 0.197 | UDP-N-acetylglucosamine 4-epimerase inhibitor               |
| <b>0.151</b> | 0.075 | Shikimate 5-dehydrogenase inhibitor                         |
| <b>0.163</b> | 0.088 | Glycine C-acetyltransferase inhibitor                       |
| <b>0.235</b> | 0.160 | MMP9 expression inhibitor                                   |
| <b>0.125</b> | 0.050 | Glycerol-3-phosphate dehydrogenase (NAD+) inhibitor         |
| <b>0.286</b> | 0.211 | Gastrin inhibitor                                           |
| <b>0.110</b> | 0.036 | Chelator                                                    |
| <b>0.239</b> | 0.165 | NAD(P)+-arginine ADP-ribosyltransferase inhibitor           |
| <b>0.288</b> | 0.214 | Alopecia treatment                                          |
| <b>0.151</b> | 0.077 | Homoserine dehydrogenase inhibitor                          |
| <b>0.087</b> | 0.014 | Leukotriene B4 antagonist                                   |
| <b>0.188</b> | 0.115 | O-aminophenol oxidase inhibitor                             |

|              |       |                                                             |
|--------------|-------|-------------------------------------------------------------|
| <b>0.244</b> | 0.171 | Histidine N-acetyltransferase inhibitor                     |
| <b>0.097</b> | 0.024 | Dihydrodipicolinate synthase inhibitor                      |
| <b>0.142</b> | 0.070 | Ganglioside galactosyltransferase inhibitor                 |
| <b>0.170</b> | 0.099 | Tauropine dehydrogenase inhibitor                           |
| <b>0.178</b> | 0.107 | Antitussive                                                 |
| <b>0.217</b> | 0.146 | D-lactaldehyde dehydrogenase inhibitor                      |
| <b>0.196</b> | 0.126 | Saluretic                                                   |
| <b>0.181</b> | 0.111 | Cyclohexyl-isocyanide hydratase inhibitor                   |
| <b>0.185</b> | 0.115 | Calpain inhibitor                                           |
| <b>0.251</b> | 0.182 | Nitrate reductase (cytochrome) inhibitor                    |
| <b>0.210</b> | 0.141 | CYP2A5 substrate                                            |
| <b>0.148</b> | 0.079 | Procollagen C-endopeptidase inhibitor                       |
| <b>0.203</b> | 0.134 | Lysostaphin inhibitor                                       |
| <b>0.140</b> | 0.071 | UGT1A7 substrate                                            |
| <b>0.161</b> | 0.093 | Mannitol-1-phosphatase inhibitor                            |
| <b>0.274</b> | 0.206 | Mucositis treatment                                         |
| <b>0.074</b> | 0.006 | Prostaglandin E2 antagonist                                 |
| <b>0.160</b> | 0.092 | Nitric oxide scavenger                                      |
| <b>0.185</b> | 0.118 | Nardilysin inhibitor                                        |
| <b>0.199</b> | 0.132 | Glycerol-3-phosphate dehydrogenase inhibitor                |
| <b>0.295</b> | 0.228 | Macrophage colony stimulating factor agonist                |
| <b>0.124</b> | 0.057 | Keratosis actinic (solar) treatment                         |
| <b>0.261</b> | 0.194 | Glycerol-3-phosphate oxidase inhibitor                      |
| <b>0.254</b> | 0.187 | CYP2A1 substrate                                            |
| <b>0.164</b> | 0.097 | N-(long-chain-acyl)ethanolamine deacylase inhibitor         |
| <b>0.134</b> | 0.068 | Succinic dehydrogenase inhibitor                            |
| <b>0.197</b> | 0.131 | Antidiabetic symptomatic                                    |
| <b>0.115</b> | 0.050 | Serine O-acetyltransferase inhibitor                        |
| <b>0.134</b> | 0.069 | Diisopropyl-fluorophosphatase inhibitor                     |
| <b>0.096</b> | 0.031 | Thromboxane antagonist                                      |
| <b>0.154</b> | 0.090 | Chemopreventive                                             |
| <b>0.146</b> | 0.082 | Lactaldehyde reductase inhibitor                            |
| <b>0.250</b> | 0.186 | Insulysin inhibitor                                         |
| <b>0.213</b> | 0.150 | 4-Methoxybenzoate monooxygenase (O-demethylating) inhibitor |
| <b>0.167</b> | 0.104 | Galactolipase inhibitor                                     |
| <b>0.257</b> | 0.195 | Muramoyltetrapeptide carboxypeptidase inhibitor             |
| <b>0.160</b> | 0.098 | Antiparkinsonian, tremor relieving                          |
| <b>0.135</b> | 0.074 | Cellulase inhibitor                                         |
| <b>0.121</b> | 0.061 | Pectin lyase inhibitor                                      |
| <b>0.125</b> | 0.065 | Neurotrophic factor                                         |
| <b>0.078</b> | 0.018 | Cruzipain inhibitor                                         |
| <b>0.207</b> | 0.147 | Hematopoietic inhibitor                                     |

|              |       |                                                                                 |
|--------------|-------|---------------------------------------------------------------------------------|
| <b>0.157</b> | 0.098 | ADP-ribosylarginine hydrolase inhibitor                                         |
| <b>0.094</b> | 0.034 | High-mannose-oligosaccharide beta-1,4-N-acetylglucosaminyltransferase inhibitor |
| <b>0.229</b> | 0.170 | Formaldehyde transketolase inhibitor                                            |
| <b>0.126</b> | 0.067 | Gelatinase inhibitor                                                            |
| <b>0.207</b> | 0.149 | Methylumbelliferyl-acetate deacetylase inhibitor                                |
| <b>0.257</b> | 0.199 | Lactase inhibitor                                                               |
| <b>0.224</b> | 0.166 | Glyoxylate reductase inhibitor                                                  |
| <b>0.253</b> | 0.196 | Calcium regulator                                                               |
| <b>0.176</b> | 0.119 | Proliferative diseases treatment                                                |
| <b>0.239</b> | 0.182 | UGT2B12 substrate                                                               |
| <b>0.272</b> | 0.215 | Aminobutyraldehyde dehydrogenase inhibitor                                      |
| <b>0.192</b> | 0.136 | Immunostimulant                                                                 |
| <b>0.153</b> | 0.097 | Dynein ATPase inhibitor                                                         |
| <b>0.138</b> | 0.083 | Acylaminoacyl-peptidase inhibitor                                               |
| <b>0.190</b> | 0.134 | Leukotriene-B4 20-monooxygenase inhibitor                                       |
| <b>0.134</b> | 0.078 | Glucan 1,4-beta-glucosidase inhibitor                                           |
| <b>0.072</b> | 0.017 | Prostaglandin antagonist                                                        |
| <b>0.378</b> | 0.323 | Gluconate 2-dehydrogenase (acceptor) inhibitor                                  |
| <b>0.078</b> | 0.023 | Leukotriene C antagonist                                                        |
| <b>0.166</b> | 0.111 | Xylan endo-1,3-beta-xylosidase inhibitor                                        |
| <b>0.206</b> | 0.152 | N-benzyloxycarbonylglycine hydrolase inhibitor                                  |
| <b>0.250</b> | 0.197 | Beta-adrenergic receptor kinase inhibitor                                       |
| <b>0.250</b> | 0.197 | G-protein-coupled receptor kinase inhibitor                                     |
| <b>0.111</b> | 0.058 | Squalene epoxidase inhibitor                                                    |
| <b>0.241</b> | 0.188 | CYP3A1 substrate                                                                |
| <b>0.115</b> | 0.062 | Glycerol-3-phosphate O-acyltransferase inhibitor                                |
| <b>0.059</b> | 0.007 | Carbonic anhydrase XIV inhibitor                                                |
| <b>0.135</b> | 0.082 | Tripeptide aminopeptidase inhibitor                                             |
| <b>0.185</b> | 0.134 | Coccolysin inhibitor                                                            |
| <b>0.074</b> | 0.023 | Peroxisome proliferator-activated receptor agonist                              |
| <b>0.121</b> | 0.070 | Xanthine oxidase inhibitor                                                      |
| <b>0.157</b> | 0.106 | Alkylglycerophosphoethanolamine phosphodiesterase inhibitor                     |
| <b>0.242</b> | 0.191 | Aspartate-phenylpyruvate transaminase inhibitor                                 |
| <b>0.228</b> | 0.178 | CYP2C substrate                                                                 |
| <b>0.134</b> | 0.084 | Magnesium-protoporphyrin IX methyltransferase inhibitor                         |
| <b>0.235</b> | 0.186 | Cyanoalanine nitrilase inhibitor                                                |
| <b>0.129</b> | 0.080 | Interleukin 1 antagonist                                                        |
| <b>0.181</b> | 0.132 | Glucan 1,4-alpha-maltotetraohydrolase inhibitor                                 |
| <b>0.069</b> | 0.020 | Vanilloid 4 antagonist                                                          |
| <b>0.127</b> | 0.079 | Acylglycerone-phosphate reductase inhibitor                                     |
| <b>0.055</b> | 0.006 | VCAM-1 antagonist                                                               |
| <b>0.204</b> | 0.156 | CYP2C18 substrate                                                               |

|              |       |                                                                        |
|--------------|-------|------------------------------------------------------------------------|
| <b>0.054</b> | 0.007 | VCAM antagonist                                                        |
| <b>0.151</b> | 0.104 | Myeloblastin inhibitor                                                 |
| <b>0.077</b> | 0.030 | SULT1A2 substrate                                                      |
| <b>0.083</b> | 0.036 | Long-chain-fatty-acid-CoA ligase inhibitor                             |
| <b>0.254</b> | 0.207 | CF transmembrane conductance regulator agonist                         |
| <b>0.069</b> | 0.023 | Homoserine O-acetyltransferase inhibitor                               |
| <b>0.116</b> | 0.069 | Glycerone-phosphate O-acyltransferase inhibitor                        |
| <b>0.067</b> | 0.021 | Retinoid X alpha receptor agonist                                      |
| <b>0.114</b> | 0.068 | Monophenol monooxygenase inhibitor                                     |
| <b>0.107</b> | 0.062 | Pantothenase inhibitor                                                 |
| <b>0.119</b> | 0.074 | Adenylate cyclase inhibitor                                            |
| <b>0.090</b> | 0.045 | Ornithine decarboxylase inhibitor                                      |
| <b>0.100</b> | 0.056 | CDC25A inhibitor                                                       |
| <b>0.246</b> | 0.202 | Carboxypeptidase Taq inhibitor                                         |
| <b>0.169</b> | 0.125 | Anthelmintic                                                           |
| <b>0.072</b> | 0.029 | Antihypermotility                                                      |
| <b>0.091</b> | 0.048 | Protein-tyrosine phosphatase 1B inhibitor                              |
| <b>0.199</b> | 0.157 | NADPH-ferrihemoprotein reductase inhibitor                             |
| <b>0.158</b> | 0.117 | Mucorpepsin inhibitor                                                  |
| <b>0.124</b> | 0.083 | Interleukin 4 antagonist                                               |
| <b>0.221</b> | 0.180 | Acetylcholinesterase inhibitor                                         |
| <b>0.117</b> | 0.076 | Malate-CoA ligase inhibitor                                            |
| <b>0.085</b> | 0.045 | [acyl-carrier-protein] S-malonyltransferase inhibitor                  |
| <b>0.117</b> | 0.077 | N-(5-amino-5-carboxypentanoyl)-L-cysteinyl-D-valine synthase inhibitor |
| <b>0.053</b> | 0.013 | Carbonic anhydrase VII inhibitor                                       |
| <b>0.333</b> | 0.293 | Nootropic                                                              |
| <b>0.159</b> | 0.120 | Dihydroxy-acid dehydratase inhibitor                                   |
| <b>0.060</b> | 0.021 | Calcium channel L-type blocker                                         |
| <b>0.185</b> | 0.147 | Platelet aggregation inhibitor                                         |
| <b>0.231</b> | 0.193 | JAK2 expression inhibitor                                              |
| <b>0.254</b> | 0.216 | Dementia treatment                                                     |
| <b>0.141</b> | 0.103 | 1,4-Alpha-glucan branching enzyme inhibitor                            |
| <b>0.215</b> | 0.178 | Antiprotozoal (Leishmania)                                             |
| <b>0.093</b> | 0.056 | Cytokine release inhibitor                                             |
| <b>0.054</b> | 0.017 | Alpha-amino-acid esterase inhibitor                                    |
| <b>0.068</b> | 0.031 | 1-Alkyl-2-acetylgllycerol O-acyltransferase inhibitor                  |
| <b>0.057</b> | 0.020 | Lysophosphatidic acid receptor antagonist                              |
| <b>0.224</b> | 0.187 | Histidine kinase inhibitor                                             |
| <b>0.166</b> | 0.129 | PfA-M1 aminopeptidase inhibitor                                        |
| <b>0.288</b> | 0.251 | Platelet aggregation stimulant                                         |
| <b>0.177</b> | 0.141 | TRPA1 agonist                                                          |
| <b>0.257</b> | 0.222 | Caspase 3 stimulant                                                    |

|              |       |                                                                  |
|--------------|-------|------------------------------------------------------------------|
| <b>0.124</b> | 0.088 | Cysteine synthase inhibitor                                      |
| <b>0.202</b> | 0.167 | FMO1 substrate                                                   |
| <b>0.040</b> | 0.005 | Juvenile-hormone esterase inhibitor                              |
| <b>0.173</b> | 0.139 | Linoleoyl-CoA desaturase inhibitor                               |
| <b>0.102</b> | 0.069 | Palmitoyl-CoA hydrolase inhibitor                                |
| <b>0.102</b> | 0.069 | Acyl-CoA hydrolase inhibitor                                     |
| <b>0.244</b> | 0.210 | CYP2C8 substrate                                                 |
| <b>0.126</b> | 0.093 | D-xylulose reductase inhibitor                                   |
| <b>0.099</b> | 0.066 | Sorbose dehydrogenase inhibitor                                  |
| <b>0.102</b> | 0.070 | Dimethylhistidine N-methyltransferase inhibitor                  |
| <b>0.180</b> | 0.148 | H <sup>+</sup> -exporting ATPase inhibitor                       |
| <b>0.137</b> | 0.105 | Styrene-oxide isomerase inhibitor                                |
| <b>0.253</b> | 0.221 | Pin1 inhibitor                                                   |
| <b>0.115</b> | 0.084 | Glycosylphosphatidylinositol diacylglycerol-lyase inhibitor      |
| <b>0.053</b> | 0.022 | Peroxisome proliferator-activated receptor alpha agonist         |
| <b>0.130</b> | 0.098 | NAD <sup>+</sup> synthase (glutamine-hydrolysing) inhibitor      |
| <b>0.256</b> | 0.225 | Sulfur reductase inhibitor                                       |
| <b>0.073</b> | 0.042 | 3-Dehydroquinate synthase inhibitor                              |
| <b>0.110</b> | 0.079 | Glucosamine-6-phosphate deaminase inhibitor                      |
| <b>0.116</b> | 0.086 | Bcl2 antagonist                                                  |
| <b>0.178</b> | 0.148 | Acetylserotonin O-methyltransferase inhibitor                    |
| <b>0.126</b> | 0.096 | Corticosteroid antagonist                                        |
| <b>0.192</b> | 0.162 | Amyotrophic lateral sclerosis treatment                          |
| <b>0.288</b> | 0.259 | CYP2J2 substrate                                                 |
| <b>0.084</b> | 0.055 | Sporulation kinase A inhibitor                                   |
| <b>0.184</b> | 0.155 | Thyroxine 5-deiodinase inhibitor                                 |
| <b>0.143</b> | 0.114 | Sedoheptulose-bisphosphatase inhibitor                           |
| <b>0.099</b> | 0.070 | Phosphoglycerate mutase inhibitor                                |
| <b>0.199</b> | 0.170 | Hydroxylamine reductase (NADH) inhibitor                         |
| <b>0.186</b> | 0.158 | ADP-thymidine kinase inhibitor                                   |
| <b>0.100</b> | 0.072 | Site-specific DNA-methyltransferase (adenine-specific) inhibitor |
| <b>0.085</b> | 0.057 | Interleukin 1b antagonist                                        |
| <b>0.127</b> | 0.099 | IgA-specific metalloendopeptidase inhibitor                      |
| <b>0.088</b> | 0.061 | Pantetheine-phosphate adenylyltransferase inhibitor              |
| <b>0.126</b> | 0.098 | Cysteamine dioxygenase inhibitor                                 |
| <b>0.211</b> | 0.184 | Antineurogenic pain                                              |
| <b>0.275</b> | 0.249 | Complement factor D inhibitor                                    |
| <b>0.070</b> | 0.044 | Anesthetic inhalation                                            |
| <b>0.224</b> | 0.199 | Glycogen synthase stimulant                                      |
| <b>0.166</b> | 0.141 | Fructan beta-fructosidase inhibitor                              |
| <b>0.091</b> | 0.066 | Acyloxyacyl hydrolase inhibitor                                  |
| <b>0.097</b> | 0.073 | Protein-tyrosine phosphatase inhibitor                           |

|              |       |                                                                 |
|--------------|-------|-----------------------------------------------------------------|
| <b>0.057</b> | 0.033 | CDC25B inhibitor                                                |
| <b>0.198</b> | 0.175 | Venom exonuclease inhibitor                                     |
| <b>0.263</b> | 0.240 | Neurotransmitter antagonist                                     |
| <b>0.099</b> | 0.076 | Sulfotransferase substrate                                      |
| <b>0.075</b> | 0.053 | Amino-acid racemase inhibitor                                   |
| <b>0.089</b> | 0.067 | Arylformamidase inhibitor                                       |
| <b>0.061</b> | 0.039 | Mannosidase inhibitor                                           |
| <b>0.090</b> | 0.068 | 4-Alpha-glucanotransferase inhibitor                            |
| <b>0.103</b> | 0.081 | Protein phosphatase inhibitor                                   |
| <b>0.150</b> | 0.128 | Glycerol 2-dehydrogenase (NADP+) inhibitor                      |
| <b>0.124</b> | 0.103 | Sphinganine-1-phosphate aldolase inhibitor                      |
| <b>0.048</b> | 0.026 | tRNA (adenine-N1-)-methyltransferase inhibitor                  |
| <b>0.179</b> | 0.158 | Endothelial growth factor antagonist                            |
| <b>0.060</b> | 0.040 | N-acetylmuramoyl-L-alanine amidase inhibitor                    |
| <b>0.101</b> | 0.081 | NAD+ kinase inhibitor                                           |
| <b>0.133</b> | 0.113 | N-methyl-2-oxoglutaramate hydrolase inhibitor                   |
| <b>0.043</b> | 0.023 | Leukotriene C4 antagonist                                       |
| <b>0.186</b> | 0.167 | Antiischemic                                                    |
| <b>0.137</b> | 0.118 | Protein-Npi-phosphohistidine-sugar phosphotransferase inhibitor |
| <b>0.180</b> | 0.161 | Antiparkinsonian, rigidity relieving                            |
| <b>0.028</b> | 0.010 | Retinoic acid receptor agonist                                  |
| <b>0.076</b> | 0.057 | mRNA (guanine-N7-)-methyltransferase inhibitor                  |
| <b>0.020</b> | 0.002 | Eukaryotic elongation factor 2 kinase inhibitor                 |
| <b>0.256</b> | 0.238 | 2-Hydroxyquinoline 8-monooxygenase inhibitor                    |
| <b>0.144</b> | 0.127 | 2-Oxoaldehyde dehydrogenase (NADP+) inhibitor                   |
| <b>0.144</b> | 0.126 | Prenyl-diphosphatase inhibitor                                  |
| <b>0.058</b> | 0.041 | Angiotensin-converting enzyme inhibitor                         |
| <b>0.047</b> | 0.030 | Phospholipase A2 IIa inhibitor                                  |
| <b>0.143</b> | 0.127 | Vitamin-K-epoxide reductase (warfarin-insensitive) inhibitor    |
| <b>0.020</b> | 0.004 | Prostaglandin EP12 antagonist                                   |
| <b>0.157</b> | 0.141 | S-alkylcysteine lyase inhibitor                                 |
| <b>0.133</b> | 0.117 | [phosphorylase] phosphatase inhibitor                           |
| <b>0.069</b> | 0.053 | Pantoate-beta-alanine ligase inhibitor                          |
| <b>0.039</b> | 0.023 | Prostacyclin antagonist                                         |
| <b>0.166</b> | 0.151 | Uroporphyrinogen-III synthase inhibitor                         |
| <b>0.183</b> | 0.168 | Vascular dementia treatment                                     |
| <b>0.125</b> | 0.111 | HMG CoA synthase inhibitor                                      |
| <b>0.099</b> | 0.085 | Asparaginase inhibitor                                          |
| <b>0.195</b> | 0.181 | Dehydro-L-gulonate decarboxylase inhibitor                      |
| <b>0.177</b> | 0.163 | tRNA-pseudouridine synthase I inhibitor                         |
| <b>0.229</b> | 0.216 | Sulfite dehydrogenase inhibitor                                 |
| <b>0.147</b> | 0.134 | Ketol-acid reductoisomerase inhibitor                           |

|              |       |                                                                     |
|--------------|-------|---------------------------------------------------------------------|
| <b>0.233</b> | 0.219 | 3-Hydroxybenzoate 6-monooxygenase inhibitor                         |
| <b>0.036</b> | 0.022 | Leukotriene D4 antagonist                                           |
| <b>0.201</b> | 0.188 | Adenylyl-sulfate reductase inhibitor                                |
| <b>0.193</b> | 0.180 | Exoribonuclease II inhibitor                                        |
| <b>0.132</b> | 0.119 | Envelysin inhibitor                                                 |
| <b>0.165</b> | 0.153 | Antineoplastic enhancer                                             |
| <b>0.051</b> | 0.040 | Magnolysin inhibitor                                                |
| <b>0.182</b> | 0.170 | Glucan 1,4-alpha-maltotriohydrolase inhibitor                       |
| <b>0.161</b> | 0.150 | Glutathione dehydrogenase (ascorbate) inhibitor                     |
| <b>0.194</b> | 0.184 | Peptide-N4-(N-acetyl-beta-glucosaminyl)asparagine amidase inhibitor |
| <b>0.249</b> | 0.239 | Prion diseases treatment                                            |
| <b>0.102</b> | 0.092 | Steroid 9alpha-monooxygenase inhibitor                              |
| <b>0.012</b> | 0.003 | Apolipoprotein A inhibitor                                          |
| <b>0.252</b> | 0.243 | Rubredoxin-NAD+ reductase inhibitor                                 |
| <b>0.183</b> | 0.175 | Peptide alpha-N-acetyltransferase inhibitor                         |
| <b>0.216</b> | 0.207 | Hydroxylamine oxidase inhibitor                                     |
| <b>0.051</b> | 0.042 | D-Serine ammonia-lyase inhibitor                                    |
| <b>0.071</b> | 0.063 | S-methyl-5-thioribose kinase inhibitor                              |
| <b>0.126</b> | 0.117 | L-glucuronate reductase inhibitor                                   |
| <b>0.047</b> | 0.039 | Cysteine dioxygenase inhibitor                                      |
| <b>0.046</b> | 0.039 | Secretory phospholipase A2 inhibitor                                |
| <b>0.012</b> | 0.004 | Factor IXa inhibitor                                                |
| <b>0.033</b> | 0.026 | Dopamine precursors                                                 |
| <b>0.162</b> | 0.155 | Peroxidase substrate                                                |
| <b>0.063</b> | 0.057 | L-3-cyanoalanine synthase inhibitor                                 |
| <b>0.127</b> | 0.121 | Phosphatidylglycerophosphatase inhibitor                            |
| <b>0.224</b> | 0.219 | CYP3A substrate                                                     |
| <b>0.077</b> | 0.071 | Retinoic acid beta receptor agonist                                 |
| <b>0.183</b> | 0.177 | AR expression inhibitor                                             |
| <b>0.114</b> | 0.109 | Guanidinoacetate N-methyltransferase inhibitor                      |
| <b>0.154</b> | 0.149 | Sorbitol-6-phosphate 2-dehydrogenase inhibitor                      |
| <b>0.077</b> | 0.072 | Cyclooxygenase 2 inhibitor                                          |
| <b>0.107</b> | 0.102 | Phosphoenolpyruvate-protein phosphotransferase inhibitor            |
| <b>0.012</b> | 0.007 | Caspase 7 inhibitor                                                 |
| <b>0.284</b> | 0.279 | Glutamyl endopeptidase II inhibitor                                 |
| <b>0.128</b> | 0.124 | Paraoxonase substrate                                               |
| <b>0.112</b> | 0.108 | Farnesyltranstransferase inhibitor                                  |
| <b>0.107</b> | 0.103 | Radical formation agonist                                           |
| <b>0.042</b> | 0.038 | Elastase inhibitor                                                  |
| <b>0.040</b> | 0.037 | Acetyl-CoA transferase 2 inhibitor                                  |
| <b>0.065</b> | 0.062 | Acetate-CoA ligase inhibitor                                        |
| <b>0.100</b> | 0.097 | Beta lactamase inhibitor                                            |

|              |       |                                            |
|--------------|-------|--------------------------------------------|
| <b>0.175</b> | 0.173 | Xenobiotic-transporting ATPase inhibitor   |
| <b>0.087</b> | 0.085 | 6-Methylsalicylate decarboxylase inhibitor |
| <b>0.114</b> | 0.113 | Phenol 2-monooxygenase inhibitor           |
| <b>0.164</b> | 0.163 | 1,2-alpha-L-fucosidase inhibitor           |
| <b>0.079</b> | 0.077 | Glycine hydroxymethyltransferase inhibitor |
| <b>0.158</b> | 0.157 | Diuretic                                   |
| <b>0.111</b> | 0.110 | Phenylacetate-CoA ligase inhibitor         |
| <b>0.179</b> | 0.178 | Antihypertensive                           |
| <b>0.122</b> | 0.120 | Arylacetonitrilase inhibitor               |
| <b>0.211</b> | 0.210 | Antiprotozoal (Amoeba)                     |
| <b>0.084</b> | 0.083 | Homocysteine desulfhydrase inhibitor       |
| <b>0.190</b> | 0.189 | Gluconate 5-dehydrogenase inhibitor        |
| <b>0.163</b> | 0.163 | 3-Methylbutanal reductase inhibitor        |
